# Supplementary material for: Stratification of Pediatric COVID-19 Cases Using Inflammatory Biomarker Profiling and Machine Learning
Source: MDPI journal article supplement (doi:10.3390/jcm12175435), 2023-08-22
Supplement: s1 [file s1]

## Supplementary Material

**Supplementary Figure S1a:** SARS-CoV-2 positive case trends at TCH during the COVID-19 pandemic. These data represent the 7-day average of SARS-CoV-2 positive cases over time from March 2020 – February 2022.

Specimens from positive cases have been stored at TCH-CB for future studies.

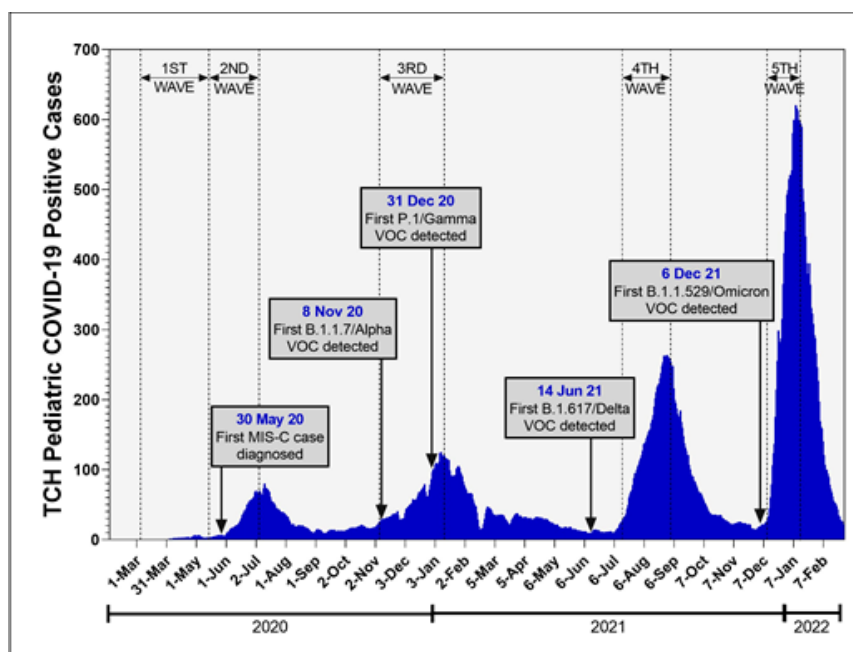

**Supplementary Figure S1b:** Temporal changes in circulating SARS-CoV-2 variants in pediatric patients. Significant changes have been observed in SARS-CoV-2 variants identified at TCH over the past 22 months. Predominance of lineages have shifted from B.1 in 2020 and B.1.2 in January 2021 to a rapidly shifting variant profile with the emergence of VOCs B.1.1.7 (Alpha), B.1.617/AY.+ (Delta), and BA.+ (Omicron).

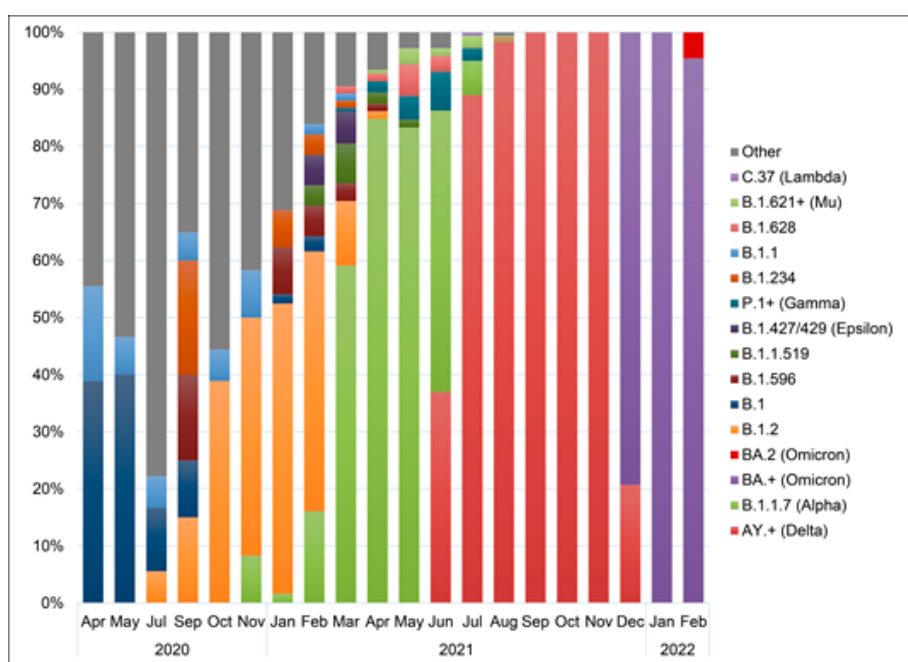

**Supplementary Figure S2:** Distribution of the number of days after sample collection that a diagnosis of MIS-C was made in the MIS-C cohort in the training set, and validation sets 1 and 2. Negative numbers on the x-axis indicates the sample collection was made after the diagnosis of MIS-C was called. More than half of the MIS-C group had their samples collected prior to diagnosis.

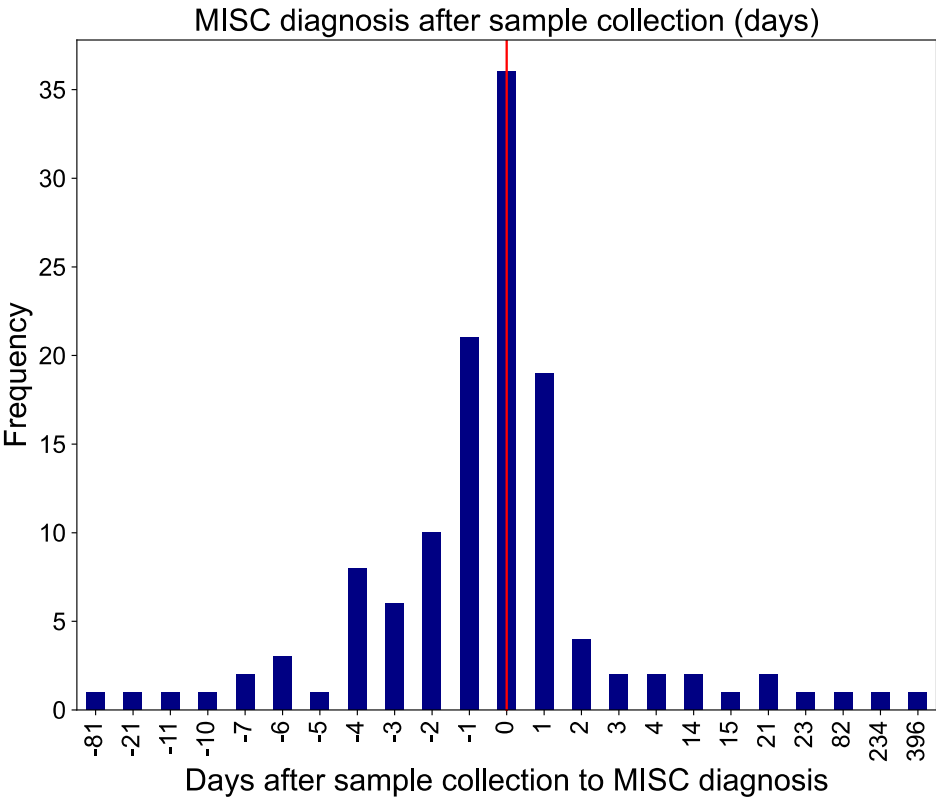

**Supplementary Figure S3:** 5-fold cross-validated L1 regularized model logistic trained by cross-validation using lab biomarker data only. The model uses a total of 12 lab biomarkers, note that the model does not select Troponin I.

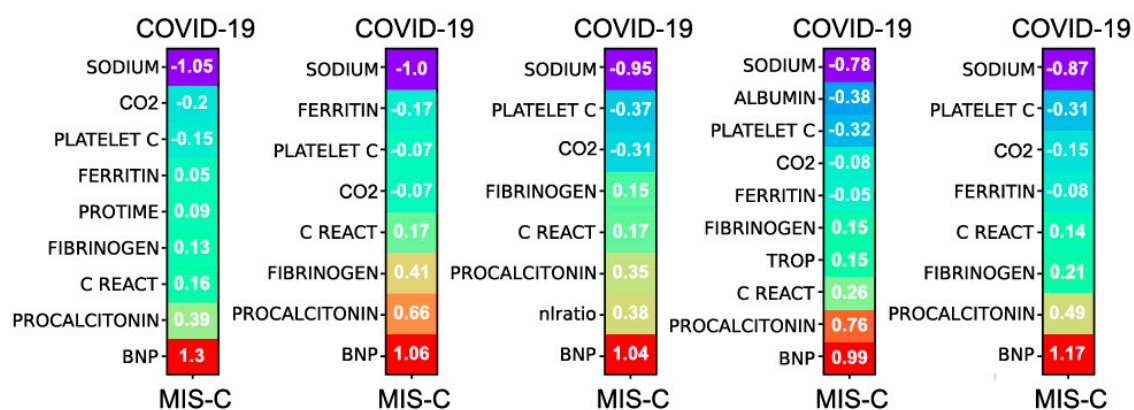

**Supplementary Figure S4a:** Sorted heat map of 45 measured cytokines/chemokines for the MIS-C and COVID-19 patients in the training set. Each column represents the chemokine/cytokine profile for a patient. The color gradient represents the standardized values of each of the cytokines/chemokines. Patients to the left of the red vertical line are COVID-19 patients, while those to the right are MIS-C. The MIS-C cohort has elevated levels of cytokines/chemokines on average, although the COVID-19 cohort also has patients with elevated levels at the right end. The cytokines/chemokines on the y-axis are sorted in ascending order based on the p-value of the Wilcoxon-rank-sum test to differentiate COVID-19 samples from MIS-C. The horizontal red line demarcates those cytokines/chemokines whose p-value falls above 0.05.

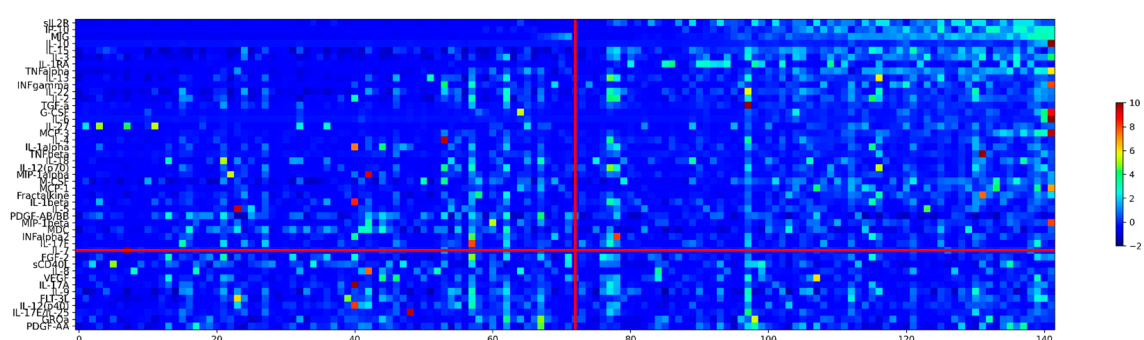

**Supplementary Figure S4b: Top:** Sorted heat map of 45 measured cytokines/chemokines for the MIS-C and COVID-19 patients in the training set, with classification errors made by the model on the training set itself. Each column represents the chemokine/cytokine profile for a patient. The color gradient represents the standardized values of each of the cytokines/chemokines. Patients to the left of the red vertical line are COVID-19 patients, while those to the right are MIS-C. Note that all seven errors are MIS-C patients with low inflammation levels. **Bottom:** The classification errors in the training set projected into the UMAP space. Note that all seven errors are MIS-C patients, and that six of them map into the COVID-19 clusters, indicating lower than expected inflammation levels, resembling COVID-19 rather than MIS-C.

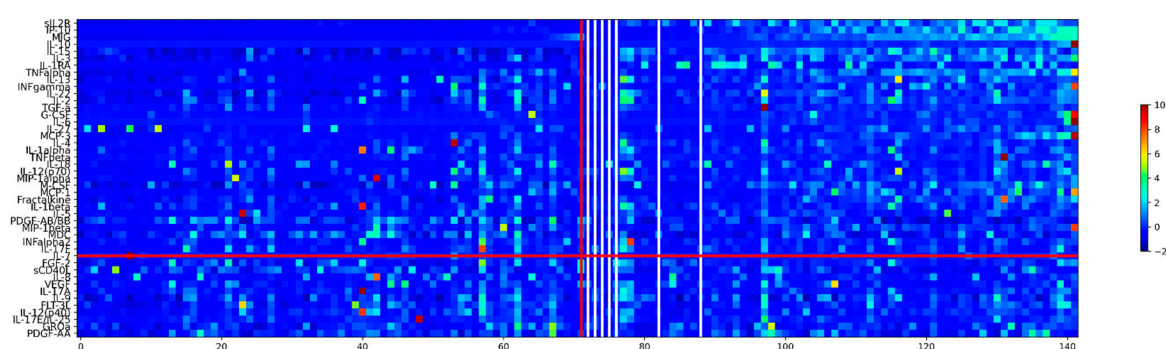

**Supplementary Figure S5:** ROC curves and confusion matrix for the training cohort, as well as the three validation cohorts.

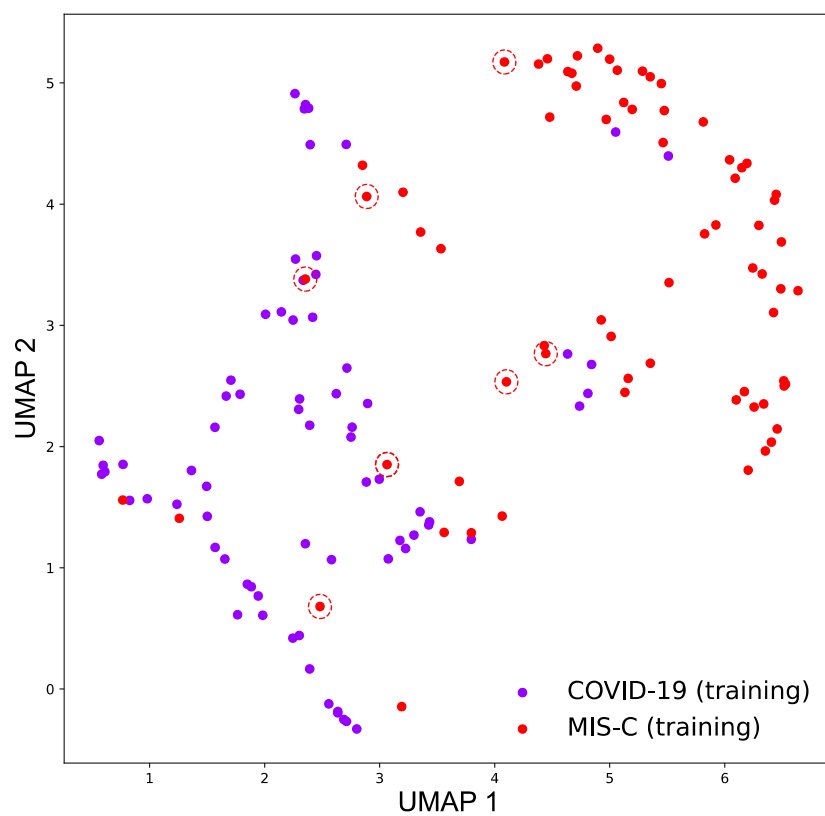

Supplementary Figure S6: Flow chart summary.

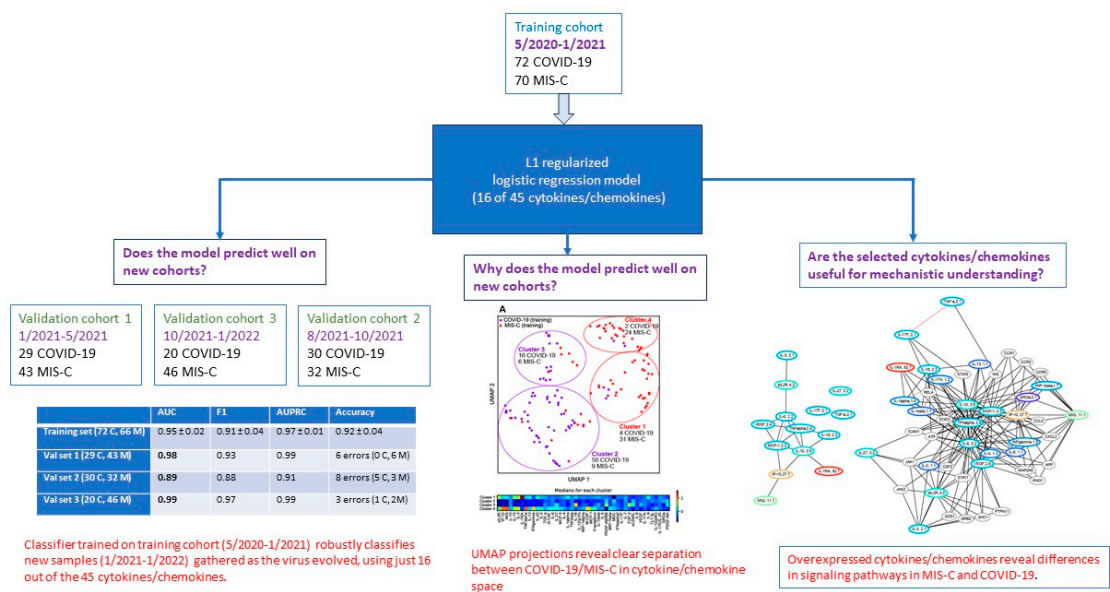

Inclusion criteria: age 18 and under, treated at the TCH system for COVID-19, who consented to providing serum samples.  
Exclusion criteria: pregnant, having other inflammatory conditions (such as HLH, Kawasaki, sepsis) not related to SARS-Cov-2.

**Supplementary Table S1:** Performance of logistic regression model trained on laboratory biomarkers of the initial cohort and tested on three *denovo* validation sets.

|                                  | <b>AUC</b>  | <b>F1</b>   | <b>AUPRC</b> | <b>Accuracy</b>       |
|----------------------------------|-------------|-------------|--------------|-----------------------|
| <b>Training set (72 C, 66 M)</b> | 0.86 ± 0.05 | 0.78 ± 0.07 | 0.88 ± 0.06  | 0.81 ± 0.06           |
| <b>Val set 1 (29 C, 43 M)</b>    | 0.85        | 0.81        | 0.89         | 15 errors (5 C, 10 M) |
| <b>Val set 2 (30 C, 32 M)</b>    | 0.84        | 0.75        | 0.84         | 14 errors (3 C, 11 M) |
| <b>Val set 3 (20 C, 46M)</b>     | 0.83        | 0.71        | 0.86         | 16 errors (4 C, 12 M) |

**Supplementary Table S2:** Characterizing cytokine/chemokine derived UMAP clusters by lab and hospital data. Medians and interquartile ranges are shown for the lab markers. Cluster 2 and Cluster 3 contain predominantly COVID-19 patients, while Cluster 1 and Cluster 4 are primarily MIS-C.

|                                  | <b>Cluster 1</b>   | <b>Cluster 2</b>    | <b>Cluster 3</b>  | <b>Cluster 4</b>    |
|----------------------------------|--------------------|---------------------|-------------------|---------------------|
| <b>CRP</b>                       | 7.3 (2.6,18.1)     | 3.2 (0.9,7.4)       | 6.3 (0.8,16.9)    | 16.4 (4.3,22.2)     |
| <b>Procalcitonin</b>             |                    |                     |                   |                     |
| <b>D-Dimer</b>                   | 2.1 (1.3,3.5)      | 1.3 (0.6,2.6)       | 1.7 (0.5,3.9)     | 3.9 (2.1,5.8)       |
| <b>BNP</b>                       | 109.4 (50.0,342.9) | 63.8 (17.9,68.3)    | 66.8 (29.6,138.7) | 300.1 (65.0, 706.2) |
| <b>Sodium</b>                    | 134 (132,139)      | 138 (135,140)       | 136.5 (133.3,138) | 134.5 (131.3, 137)  |
| <b>Platelet counts</b>           | 207 (119.5,277.5)  | 243 (161.5,396)     | 181 (149.8,313.5) | 166 (144.3,241)     |
| <b>Albumin</b>                   | 3.3 (2.9,3.8)      | 4.0 (3.4,4.6)       | 3.5 (3.2,4.2)     | 3.4 (3.1,3.6)       |
| <b>Fibrinogen</b>                | 458 (383.8, 558)   | 406.3 (325,535.5)   | 449 (389.5,596)   | 485 (385.9,583.8)   |
| <b>Protime</b>                   | 15.3 (14.2,16.5)   | 14.8 (14,15.2)      | 14.9 (14.7,16.1)  | 15.3 (14.5,16.2)    |
| <b>NL ratio</b>                  | 9.1 (3.5,14.7)     | 2.4 (1.3,5.4)       | 5.3 (2.7,11.0)    | 6.1 (1.9,14.6)      |
| <b>CO<sub>2</sub></b>            | 24 (21,28)         | 26 (23,27)          | 26 (24,27.8)      | 23 (20,26)          |
| <b>Ferritin</b>                  | 327.2 (159,485.5)  | 254.0 (117.5,379.7) | 324.4 (147,507.2) | 242 (124.3,649.0)   |
| <b>Troponin I</b>                | 0.04 (0.01, 0.11)  | 0.02 (0.01, 0.07)   | 0.02 (0.01,0.07)  | 0.02 (0.01,0.07)    |
| <b>Length of stay (days) med</b> | 7.9                | 6.7                 | 5.2               | 7.82                |
| <b>ICU LOS (days) median</b>     | 3.7                | 0                   | 2.4               | 4.47                |
| <b>ECMO (%)</b>                  | 0.0                | 2.1                 | 0.0               | 10.7                |
| <b>CPAP (%)</b>                  | 11.1               | 17.0                | 25.0              | 32.1                |
| <b>Ventilator (%)</b>            | 8.3                | 23.4                | 33.3              | 35.7                |



|                               | Cluster 1 | Cluster 2 | Cluster 3 | Cluster 4 |
|-------------------------------|-----------|-----------|-----------|-----------|
| <b>AKI (%)</b>                | 11.1      | 12.8      | 45.8      | 35.7      |
| <b>IVIg/steroids 7dys (%)</b> | 38.9      | 34.0      | 50.0      | 39.3      |
